# Supplementary material
Source: ML conference proceedings conference paper supplement (https://openaccess.thecvf.com/content/WACV2021/html/Yang_Context-Aware_Domain_Adaptation_WACV_2021_paper.html)
Supplement: Supplementary file 1 [file Yang_Context-Aware_Domain_Adaptation_WACV_2021_supplemental.pdf]

# 1 Appendix

**Network Architecture** The network architecture of two cross-domain attention modules is shown in Figure 1.

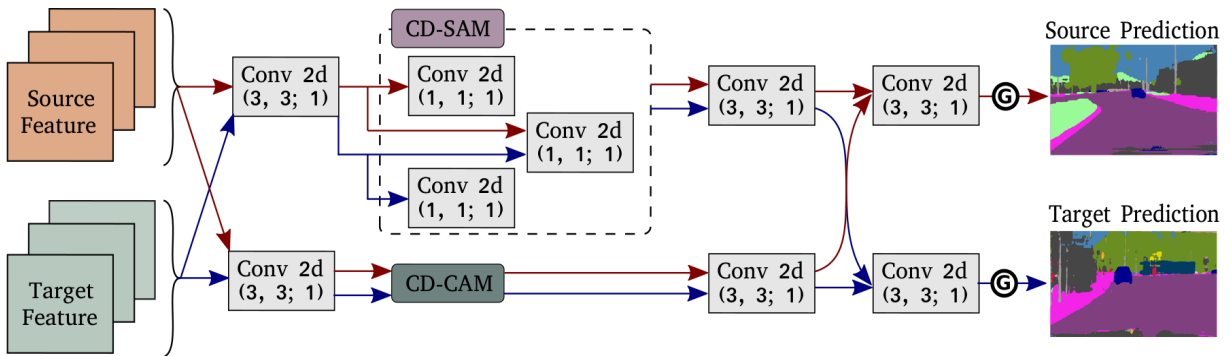

Figure 1: The network architecture of two cross-domain attention modules, where Conv 2d ( $k, k; j$ ) indicates the 2D convolution with kernel size ( $k \times k$ ) and stride  $j$ . The red and blue lines denote features from source and target domains, respectively.
